# Supplementary material for: Allenediazonium ions and their protonation chemistry: a DFT study
Source: Royal Society of Chemistry journal article supplement (doi:10.1039/b611304b), 2006-01-01

## Supporting Information File

*Revised*

### Allenediazonium Ions and their Protonation Chemistry: A DFT Study

Rodrigo O. M. A. de Souza<sup>a</sup>, Pierre M. Esteves<sup>a,\*</sup>, Kenneth K. Laali<sup>b,\*</sup>

<sup>a</sup>) Institute of Chemistry, Universidade Federal do Rio de Janeiro, Brazil

<sup>b</sup>) Department of Chemistry, Kent State University Kent, Ohio, USA

#### List of Captions

**Figure S1:** Optimized structures for protonated allenediazonium cation **C**, with selected geometric parameters, CHelpg charges ( $q$ ) and GIAO-NMR chemical shifts.

**Figure S2:** Optimized structures for protonated allenediazonium cation **D**, with selected geometric parameters, CHelpg charges ( $q$ ) and GIAO-NMR chemical shifts.

**Figure S3:** Optimized structures for protonated allenediazonium cation **E**, with selected geometric parameters, CHelpg charges ( $q$ ) and GIAO-NMR chemical shifts.

**Figure S4.** Optimized structures for protonated allenediazonium cation **G**, with selected geometric parameters, CHelpg charges ( $q$ ) and GIAO-NMR chemical shifts.

**Figure S5:** Optimized structures for protonated allenediazonium cation **I**, with selected geometric parameters, CHelpg charges ( $q$ ) and GIAO-NMR chemical shifts.

**Figure S6.** Optimized structures for protonated allenediazonium cation **J**, with selected geometric parameters, CHelpg charges ( $q$ ) and GIAO-NMR chemical shifts.

**Figure S7.** Optimized structures for protonated allenediazonium cation **K**, with selected geometric parameters, CHelpg charges ( $q$ ) and GIAO-NMR chemical shifts.

**Figure S1.** Optimized structures for protonated allenediazonium cation **C**, with selected geometric parameters, CHelpg charges ( $q$ ) and GIAO-NMR chemical shifts.

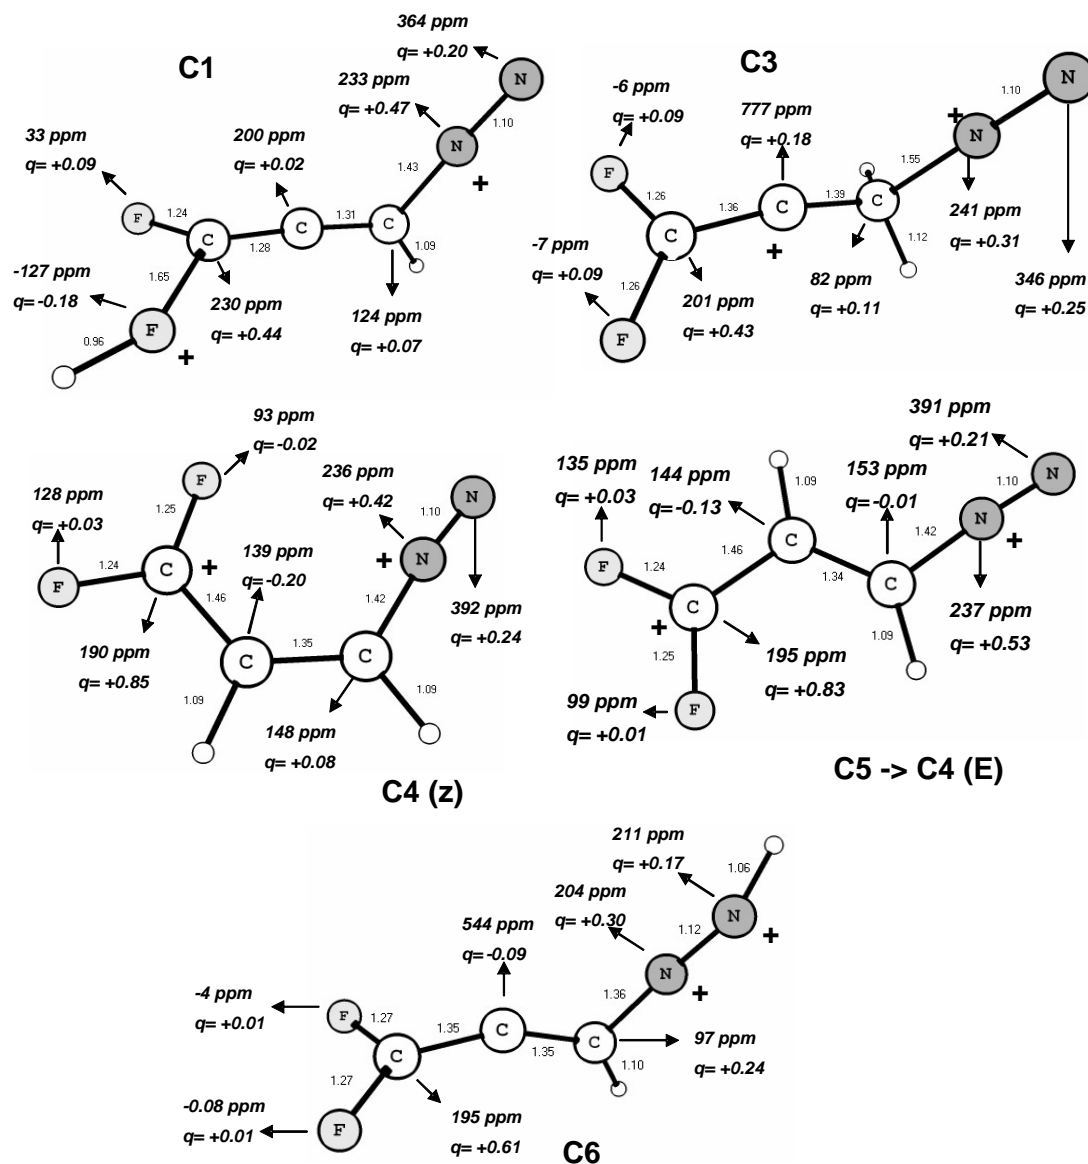

**Figure S2:** Optimized structures for protonated allenediazonium cation **D**, with selected geometric parameters, CHelpg charges ( $q$ ) and GIAO-NMR chemical shifts.

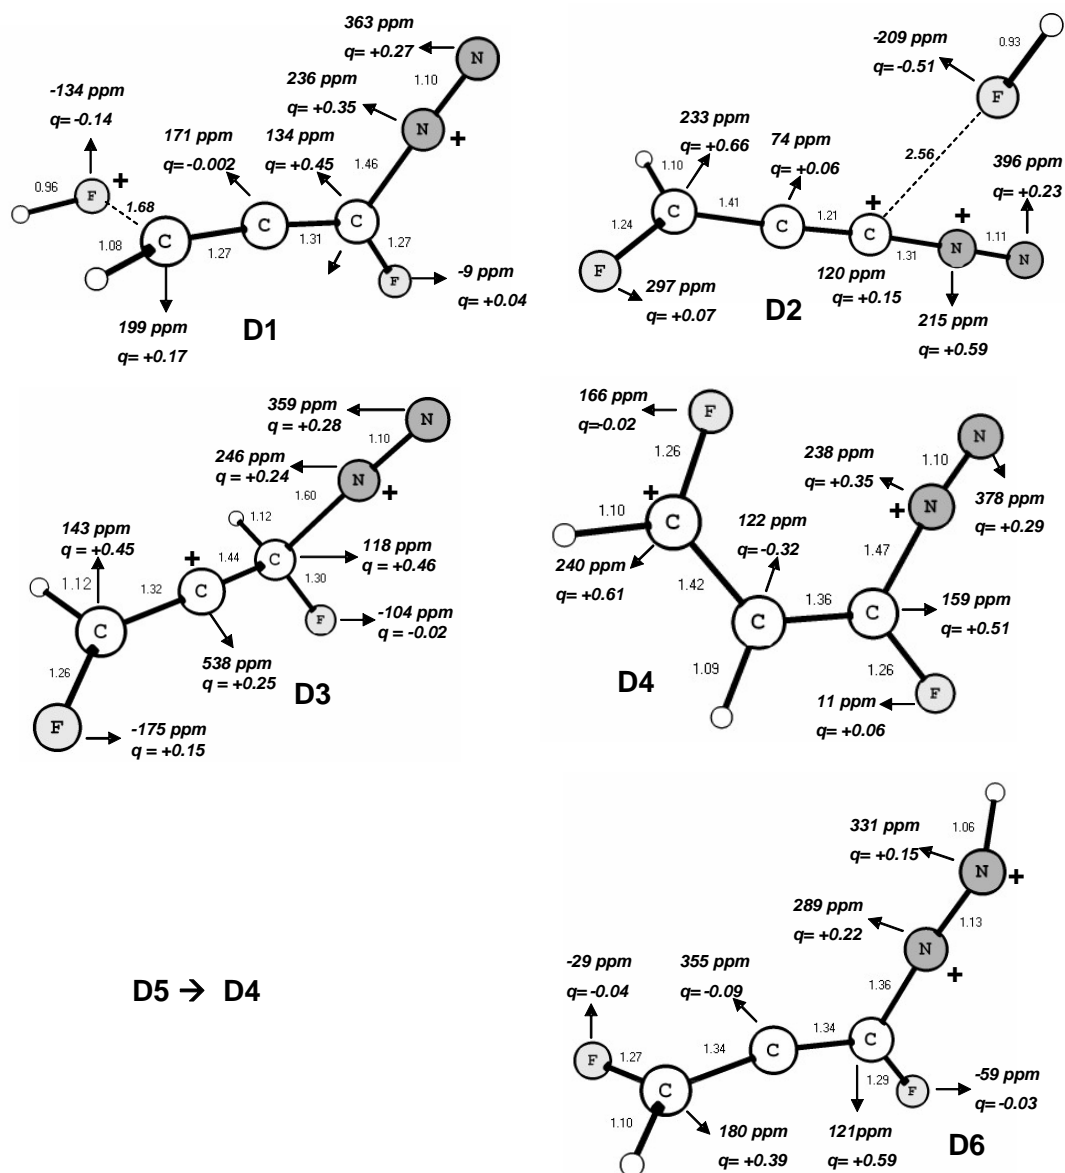

**Figure S3:** Optimized structures for protonated allenediazonium cation **E**, with selected geometric parameters, CHelpg charges ( $q$ ) and GIAO-NMR chemical shifts.

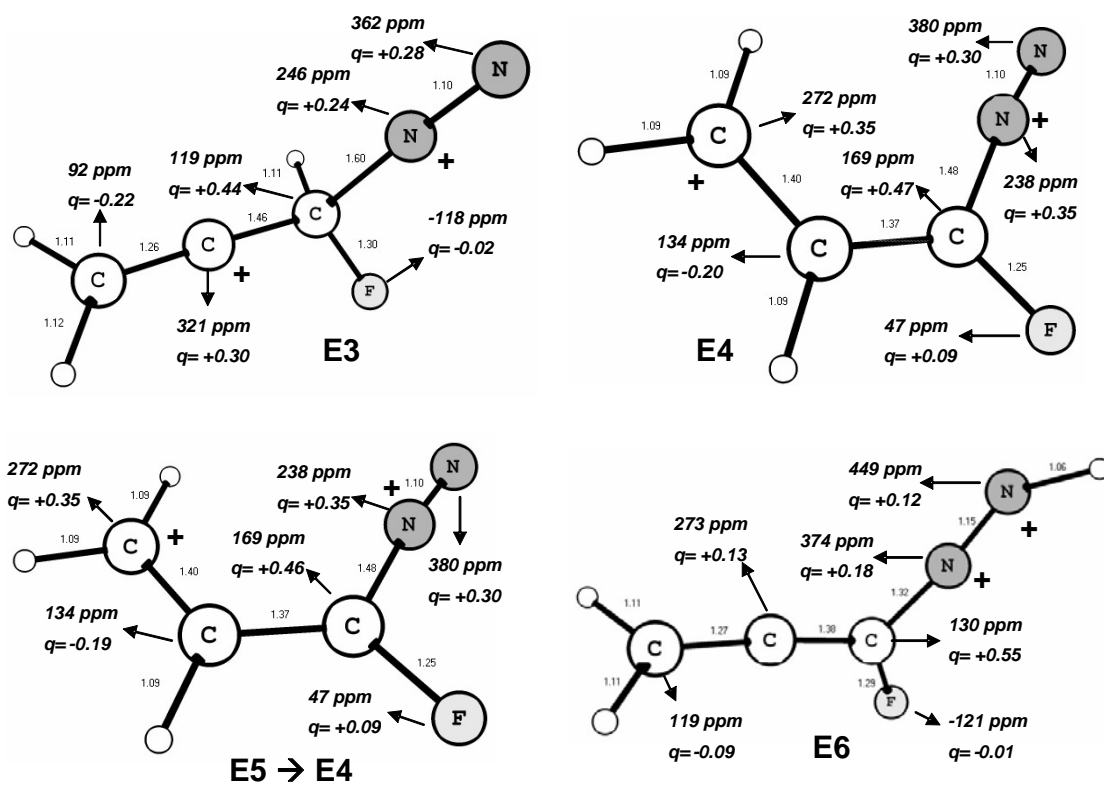

**Figure S4.** Optimized structures for protonated allenediazonium cation **G**, with selected geometric parameters, CHelpg charges ( $q$ ) and GIAO-NMR chemical shifts.

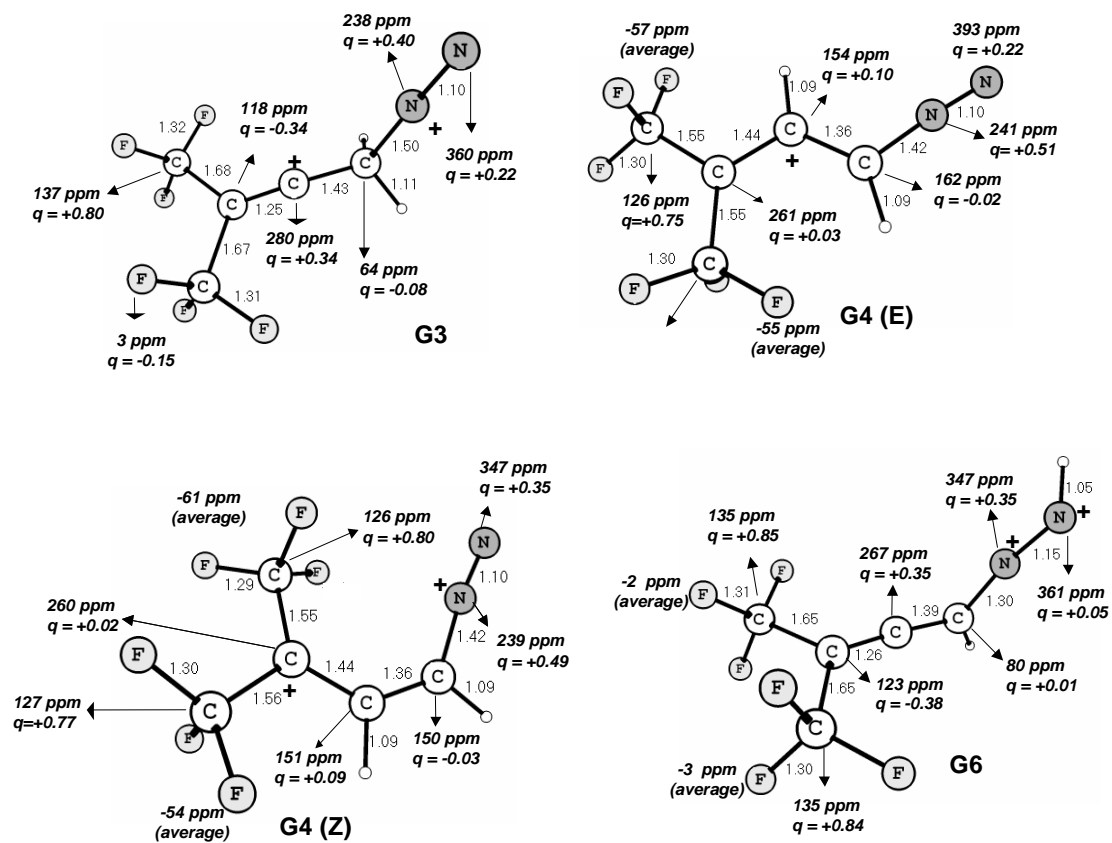

**Figure S5:** Optimized structures for protonated allenediazonium cation **I**, with selected geometric parameters, CHelpg charges ( $q$ ) and GIAO-NMR chemical shifts.

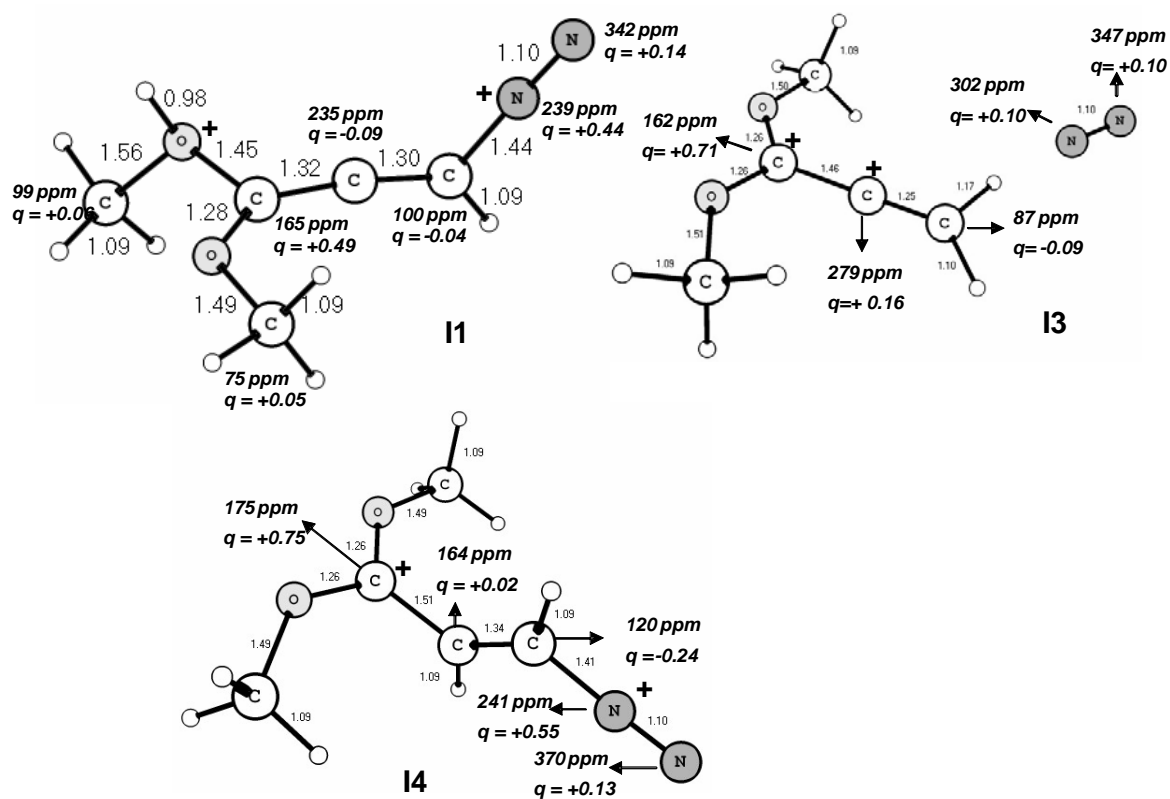

**Figure S6.** Optimized structures for protonated allenediazonium cation **J**, with selected geometric parameters, CHelpg charges ( $q$ ) and GIAO-NMR chemical shifts.

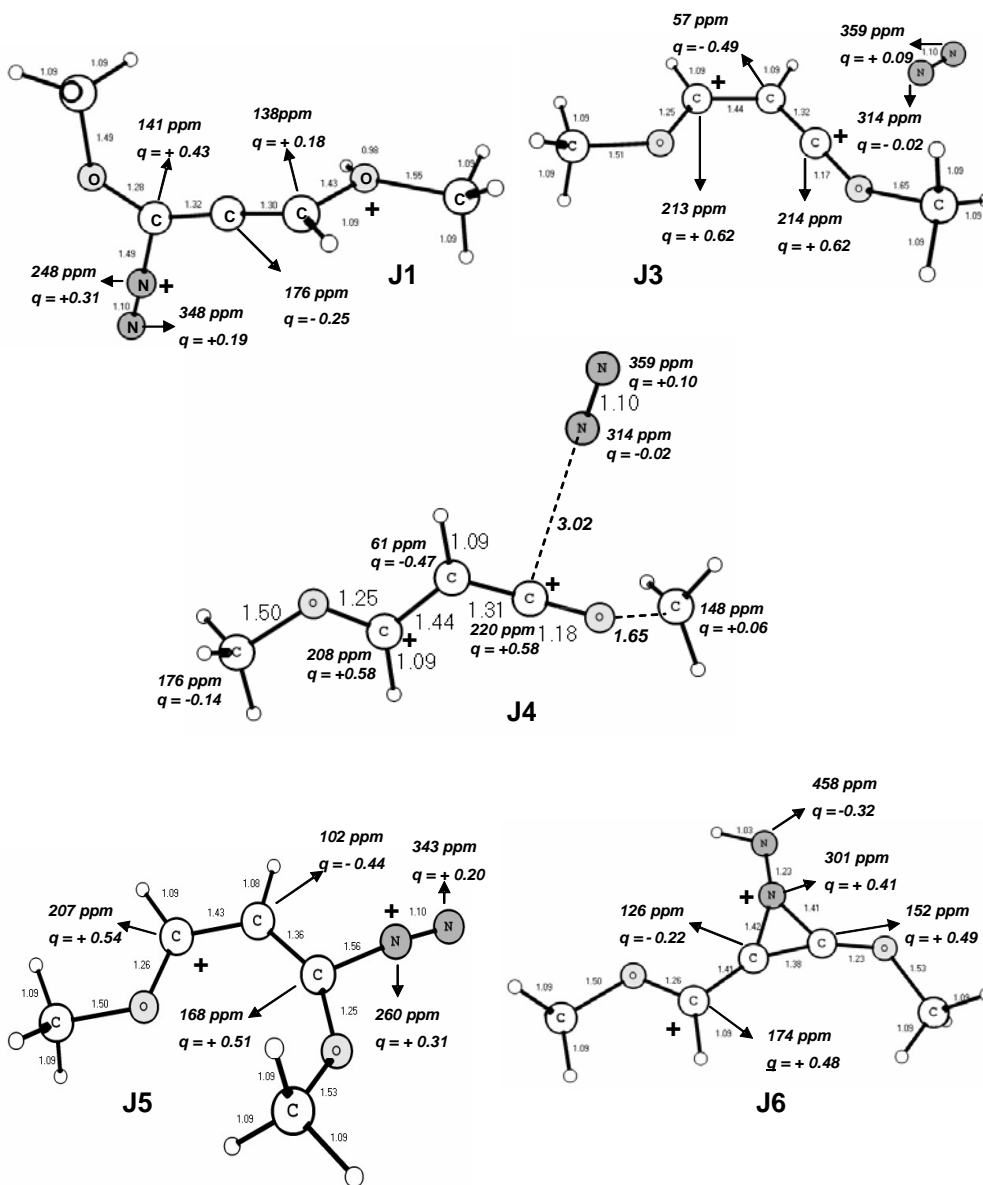

**Figure S7.** Optimized structures for protonated allenediazonium cation **K**, with selected geometric parameters, CHelpg charges ( $q$ ) and GIAO-NMR chemical shifts.

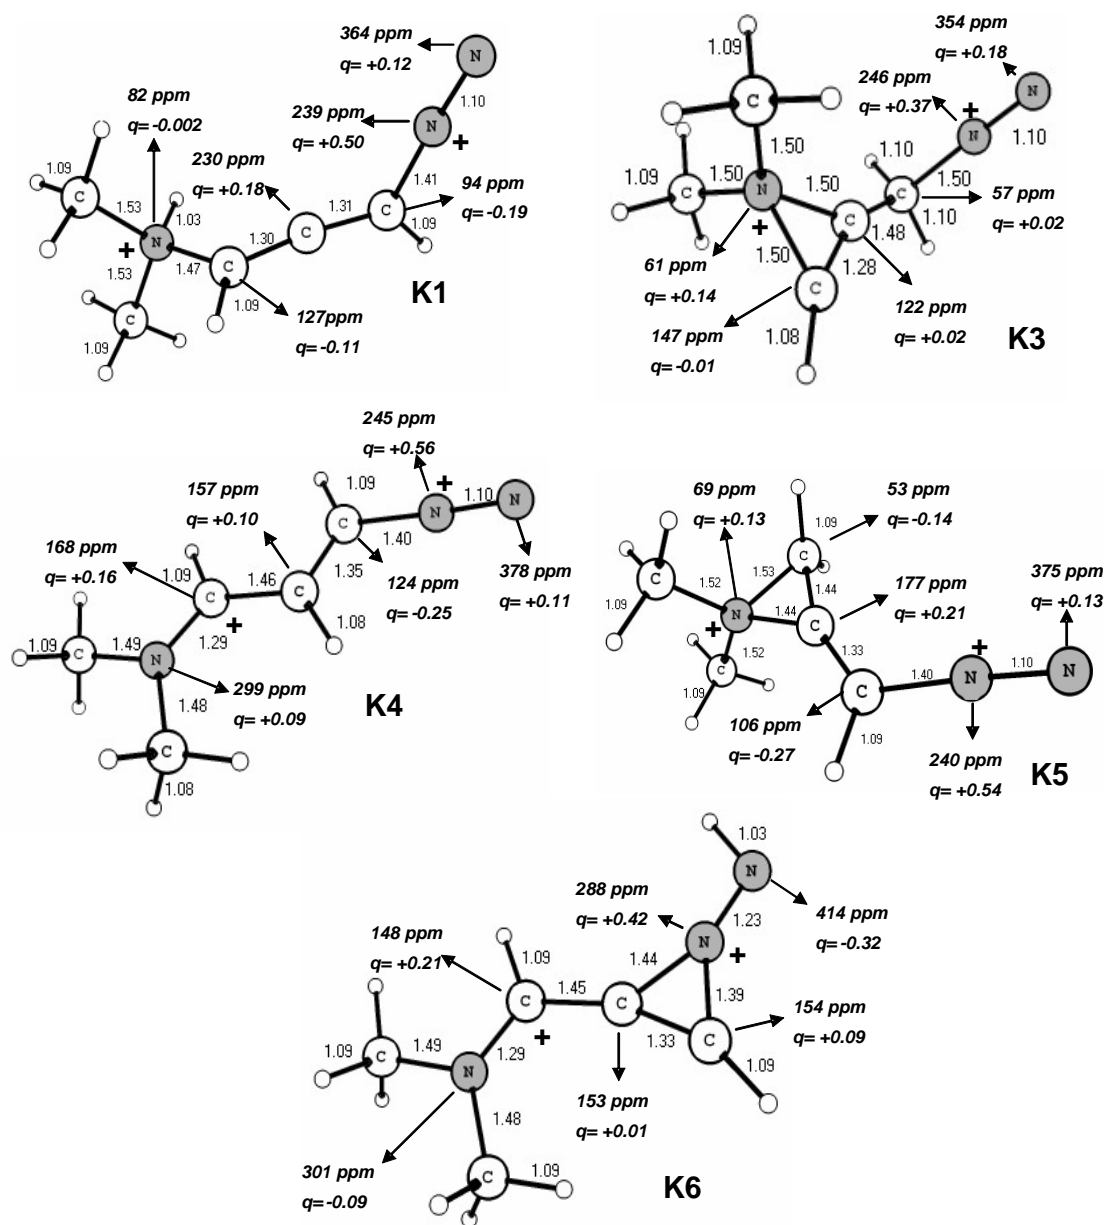

Supplement: b611304b.pdf [file b611304b.pdf]
